# Supplementary material
Source: publisher site journal article supplement (https://www.dovepress.com/article/376902)
Supplement: Supplementary file 1 [file get_supplementary_file.php]

**Supplementary material**

**Ribociclib plus letrozole in Italian male patients with hormone receptor****–positive, human epidermal growth factor receptor 2-negative advanced breast cancer: Case studies of phase 3b CompLEEment-1 trial**

Roberta Caputo,1* Alessandra Fabi, 2,3 Emanuela Romagnoli, 4 Editta Baldini, 5 Donatella Grasso, 6 Nicola Fenderico, 6 Andrea Michelotti7

**Figure S1. Timeline of tumor marker CA 15-3 levels in case 1.**

**Figure S2. Timeline of tumor marker CEA levels in case 1.**


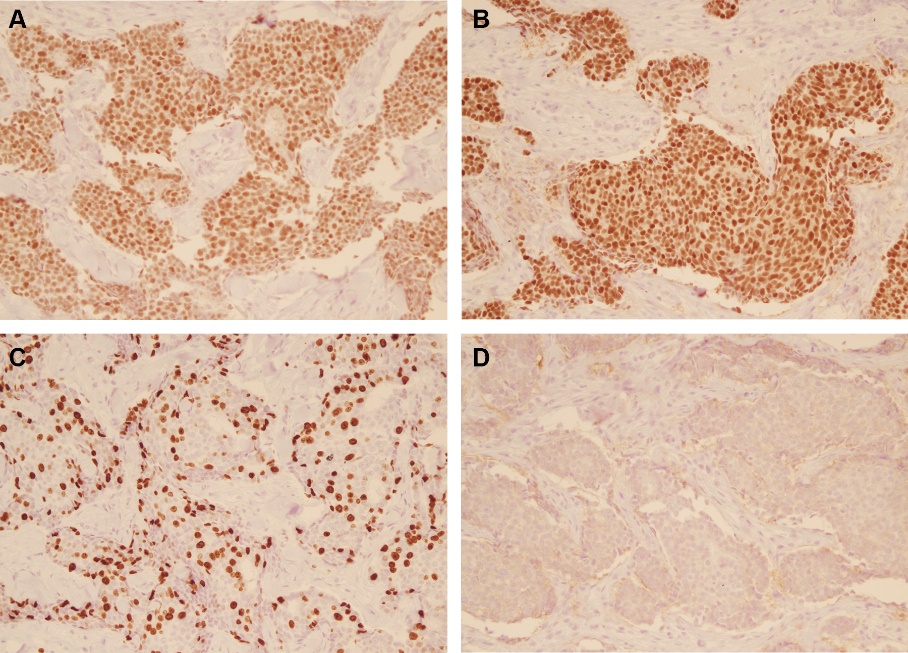


**Figure S3. Immunohistochemical staining of (A) ER, (B) PR, (C) Ki-67, and (D) HER2 in tumor tissue of case 5.**

**Table S1: Details of the approving ethics committees**

Ribociclib plus letrozole in Italian male patients with hormone receptor-positive, human epidermal growth factor receptor 2-negative advanced breast cancer: Case studies of phase 3b CompLEEment-1 trial

| S.No | Name and address of the approving ethics committees |
| --- | --- |
|  | Ethics Committee  COMITATO ETICO IRCCS Pascale - A.O.R. N. Santobono-Pausilipon  VIA MARIANO SEMMOLA  80131 NAPOLI (NA) |
|  | Ethics Committee  COMITATO REGIONE TOSCANA - AREA VASTA NORD OVEST c/o  AZIENDA OSPEDALIERO UNIVERSITARIA PISANA DI PISA  VIA ROMA, 67  56126 PISA (PI) |
|  | Ethics Committee  COMITATO ETICO REGIONALE (CER) DELLE MARCHE c/o AZIENDA  OSPEDALIERA UNIVERSITARIA OSPEDALI RIUNITI UMBERTO I-  LANCISI-GM SALESI DI ANCONA  VIA CONCA  60126 ANCONA (AN) |
|  | Ethics Committee  COMITATO REGIONE TOSCANA - AREA VASTA NORD OVEST c/o  AZIENDA OSPEDALIERO UNIVERSITARIA PISANA DI PISA  VIA ROMA, 67  56126 PISA (PI) |
|  | Ethics Committee  COMITATO ETICO CENTRALE IRCCS LAZIO - Sezione IFO-BIETTI c/o  IRCCS ISTITUTI FISIOTERAPICI OSPITALIERI DI ROMA  VIA ELIO CHIANESI, 53  00144 ROMA (RM) |
